# Supplementary material for: Nanoscale-Textured Tantalum Surfaces for Mammalian Cell Alignment
Source: Micromachines (Basel). 2018 Sep 13;9(9):464. doi: 10.3390/mi9090464 (PMC6187670; doi:10.3390/mi9090464)
Supplement: Supplementary file 1 [file micromachines-09-00464-s001.pdf]

## Supplementary Materials: Nanoscale-Textured Tantalum Surfaces for Mammalian Cell Alignment

Hassan I. Moussa, Megan Logan, Kingsley Wong, Zheng Rao, Marc G. Aucoin and Ting Y. Tsui

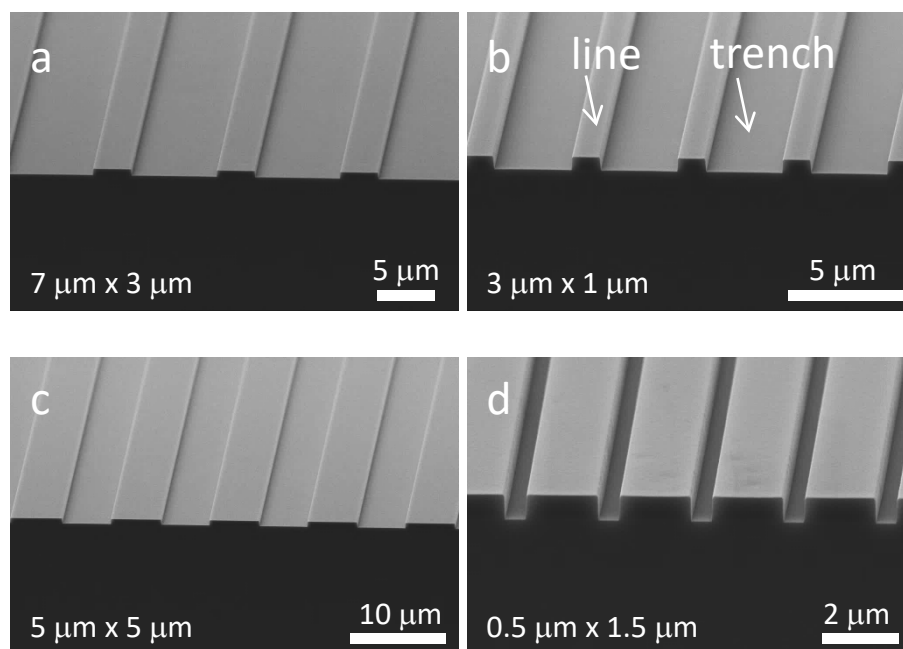

**Figure S1.** Copper stripped comb pattern structures.

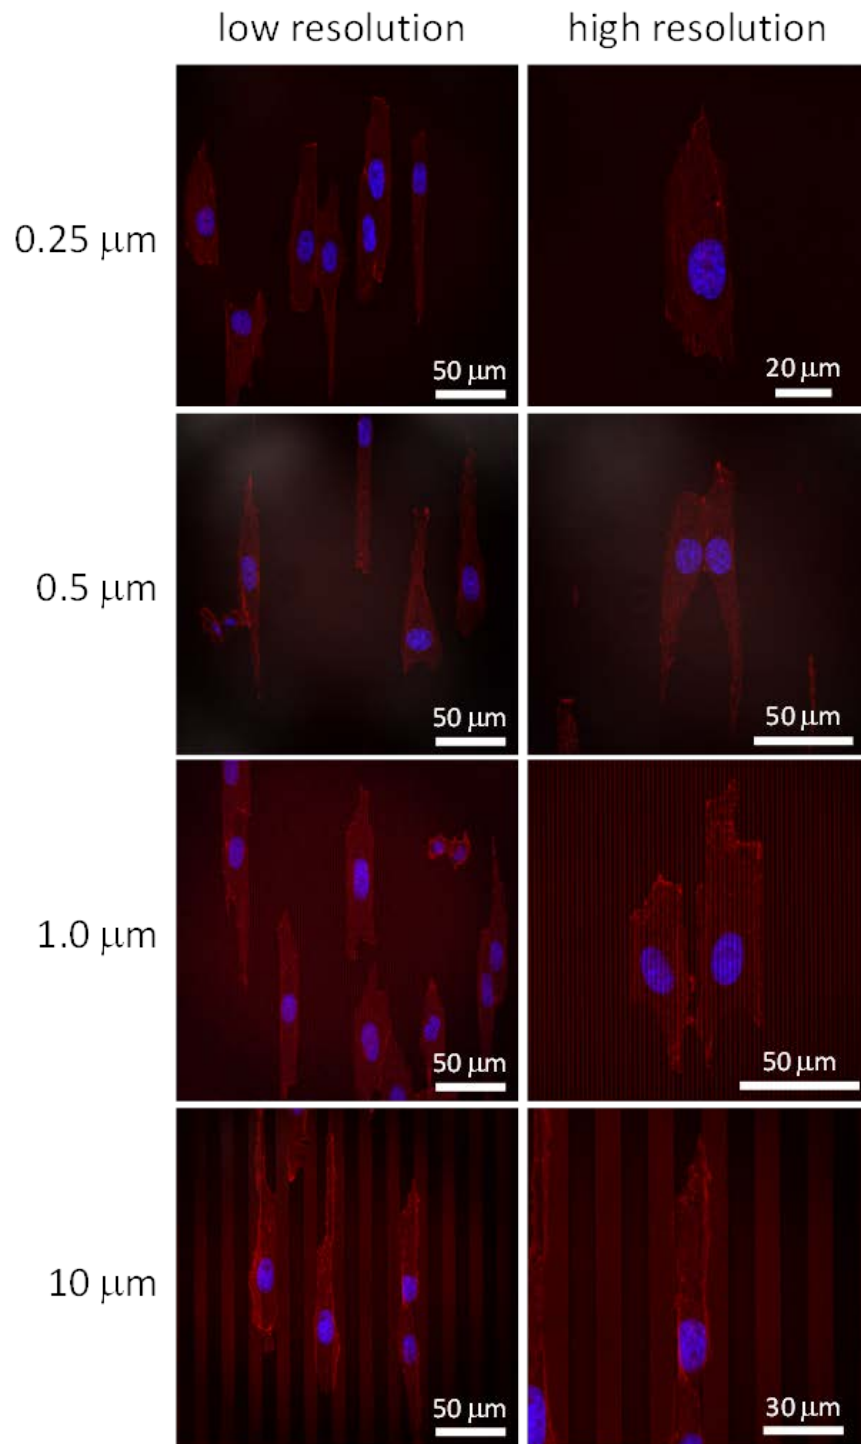

**Figure S2.** Fluorescence confocal micrographs of adherent cells on 0.25, 0.5, 1.0, and 10  $\mu\text{m}$  comb structure after 24 hours of incubation.

0.5 hour incubation on 0.18  $\mu\text{m}$  comb structure

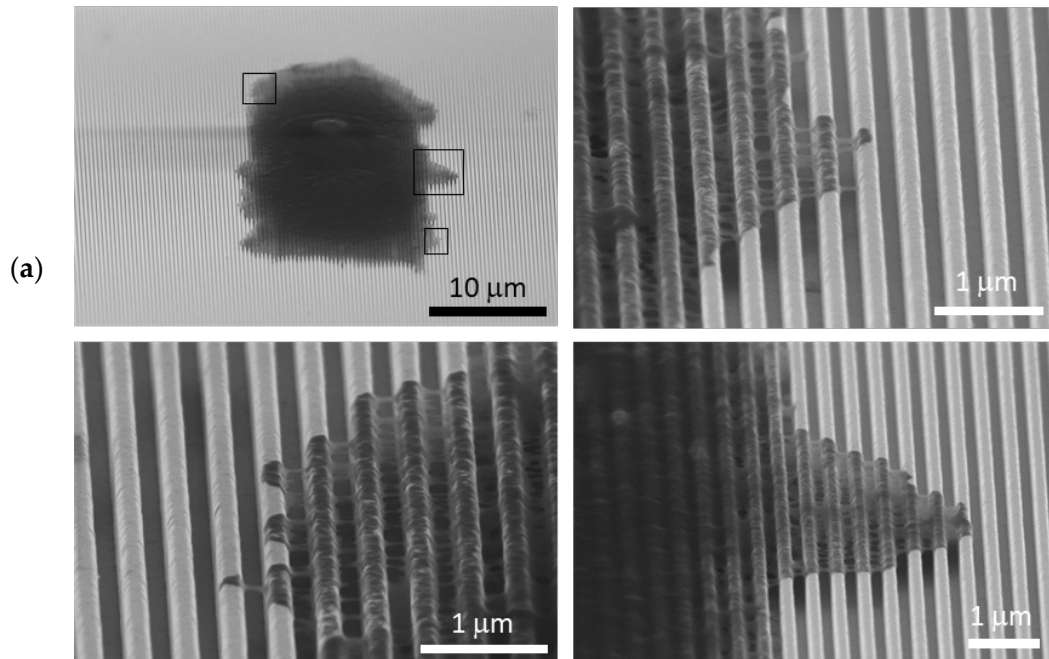

0.5 hour incubation on 0.25  $\mu\text{m}$  comb structures

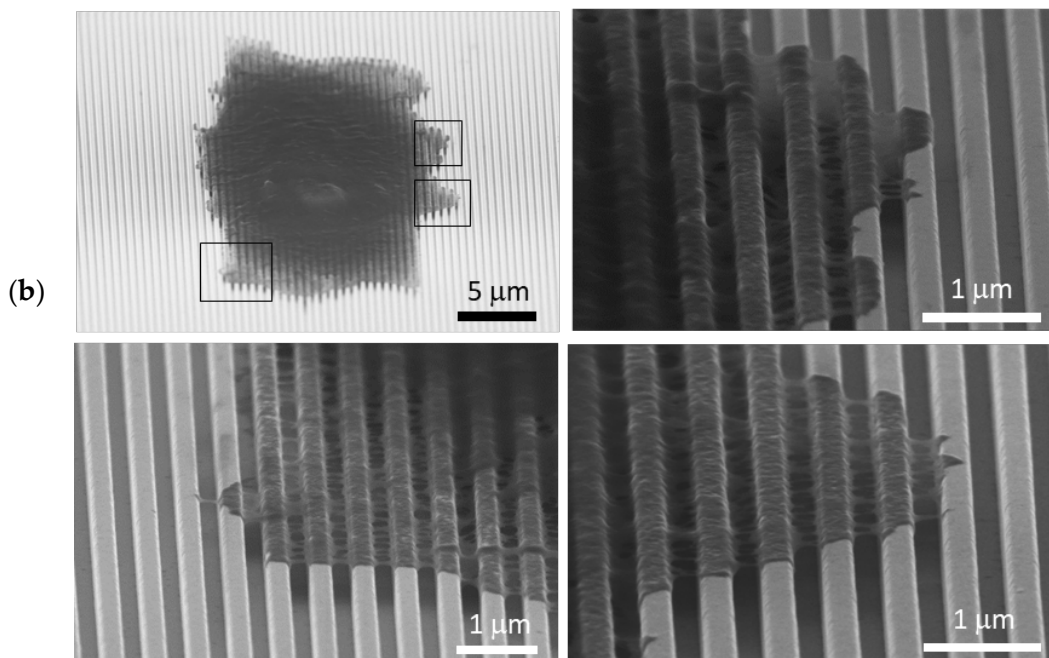

### 9 hours incubation on 0.18 $\mu\text{m}$ comb structure

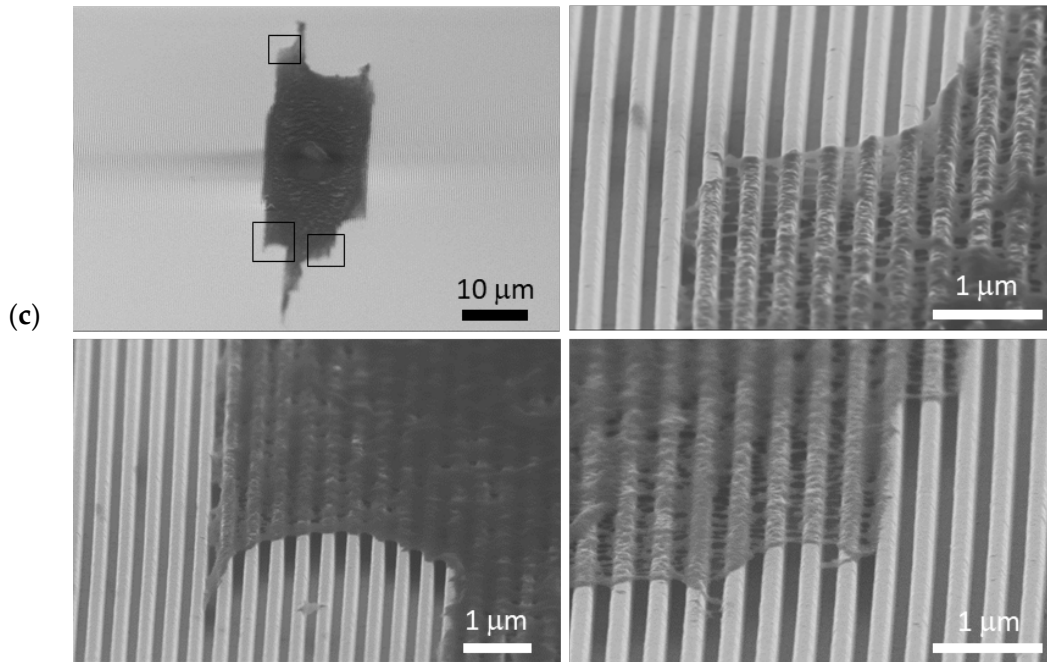

**Figure S3.** (a) 70° tilted SEM micrographs of an adherent cell on 0.18  $\mu\text{m}$  comb structure after 0.5 hour of incubation. (b) 70° tilted SEM micrographs of an adherent cell on 0.25  $\mu\text{m}$  comb structure after 0.5 hour of incubation. (c) 70° tilted SEM micrographs of an adherent cell on 0.18  $\mu\text{m}$  comb structure after 9 hours of incubation.

### 0.5 hour incubation on 0.25 $\mu\text{m}$ comb structure

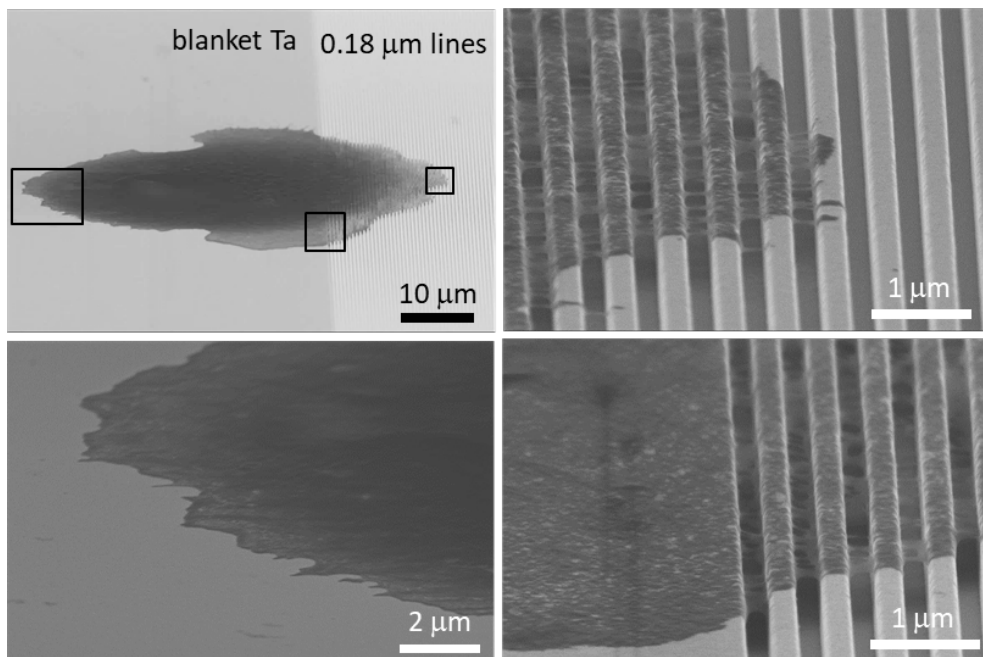

**Figure S4.** 70° tilted SEM micrographs of a cell simultaneously adhered on flat surfaces and 0.25  $\mu\text{m}$  comb structure after 0.5 hour of incubation.
